# Supplementary material
Source: PubMed Central journal article supplement (PMC9947803)

## Supplemental Online Content

Hansen HG, Starzer M, Nilsson SF, Hjorthøj C, Albert N, Nordentoft M. Clinical recovery and long-term association of specialized early intervention services vs treatment as usual among individuals with first-episode schizophrenia spectrum disorder: 20-year follow-up of the OPUS trial. *JAMA Psychiatry*. Published online February 22, 2023. doi:10.1001/jamapsychiatry.2022.5164

**eTable 1.** Baseline characteristics among participants and non-participants at 20-year follow-up

**eTable 2.** Baseline characteristics among participants and non-participants at 20-year follow-up divided between the OPUS-group and TAU-group

**eTable 3.** Last observation characteristics (excluding the 20-year assessment) among participants and non-participants at 20-year follow-up divided between the OPUS-group and TAU-group

**eTable 4.** Psychiatric Hospitalizations and Outpatient Contacts at one-two, two-five, five-ten and ten-20 Years after Randomization into Early Intervention Services (OPUS-treatment) vs. TAU

**eFigure 1.** Global functional levels between the OPUS-group and the TAU-group since start of treatment

**eFigure 2.** Percentages of Participants in Clinical Recovery at Five-, Ten- and 20-years of Follow-up

**eFigure 3.** Psychiatric hospitalizations and outpatient contacts between the OPUS-group and the TAU-group since start of treatment

This supplemental material has been provided by the authors to give readers additional information about their work.

| <b>eTable 1. Baseline characteristics among participants and non-participants at 20-year follow-up</b> |               |                        |                            |             |
|--------------------------------------------------------------------------------------------------------|---------------|------------------------|----------------------------|-------------|
|                                                                                                        | All,<br>n=547 | Participants,<br>n=164 | Non-participants,<br>n=383 | P value     |
| <i>Sociodemographics, n (%)</i>                                                                        |               |                        |                            |             |
| Age, mean (SD)                                                                                         | 26.6 (6.4)    | 25.5 (5.6)             | 27.1 (6.6)                 | <b>.007</b> |
| Sex, Female,                                                                                           | 224 (41.0)    | 85 (51.8)              | 139 (36.3)                 | <b>.001</b> |
| Studying or working                                                                                    | 142 (26.4)    | 53 (32.7)              | 89 (23.7)                  | <b>.03</b>  |
| Completed high school                                                                                  | 181 (33.6)    | 68 (41.5)              | 113 (30.2)                 | <b>.01</b>  |
| In a relationship                                                                                      | 133 (24.7)    | 43 (26.4)              | 90 (23.9)                  | .55         |
| Being a parent                                                                                         | 79 (14.6)     | 19 (11.7)              | 60 (15.9)                  | .20         |
| <i>Premorbid functioning, mean (SD)</i>                                                                |               |                        |                            |             |
| Premorbid social functioning <sup>1</sup>                                                              | 0.27 (0.22)   | 0.26 (0.22)            | 0.28 (0.22)                | .59         |
| Premorbid academic functioning <sup>2</sup>                                                            | 0.38 (0.21)   | 0.35 (0.20)            | 0.39 (0.21)                | .06         |
| <i>Living conditions, n (%)</i>                                                                        |               |                        |                            |             |
| Living alone                                                                                           | 332 (61.7)    | 106 (65.4)             | 226 (60.1)                 | .68         |
| Living with children                                                                                   | 16 (3.0)      | 5 (3.1)                | 11 (2.9)                   |             |
| Living with a partner                                                                                  | 73 (13.6)     | 23 (14.2)              | 50 (13.3)                  |             |
| Living with parents                                                                                    | 90 (16.7)     | 23 (14.2)              | 67 (17.8)                  |             |
| Living in supported housing                                                                            | 3 (0.6)       | 0 (0.0)                | 3 (0.8)                    |             |
| Homelessness                                                                                           | 24 (4.5)      | 5 (3.1)                | 19 (5.1)                   |             |
| Independent living                                                                                     | 421 (78.3)    | 134 (82.7)             | 287 (76.3)                 | .10         |
| <i>Symptom dimension, mean (SD)</i>                                                                    |               |                        |                            |             |
| Psychotic dimension <sup>3</sup> (excl. F21)                                                           | 2.96 (1.31)   | 3.00 (1.37)            | 2.94 (1.28)                | .63         |
| Negative dimension <sup>4</sup>                                                                        | 2.15 (1.15)   | 1.93 (1.12)            | 2.25 (1.16)                | <b>.003</b> |
| Disorganized dimension <sup>5</sup>                                                                    | 1.02 (0.95)   | 0.88 (0.90)            | 1.07 (0.96)                | <b>.04</b>  |
| <i>Global functioning score, mean (SD)</i>                                                             |               |                        |                            |             |
| GAF-F <sup>6</sup> , Function scale                                                                    | 41.32 (13.34) | 44.52 (13.20)          | 39.93 (13.18)              | <b>.000</b> |
| GAF-S <sup>7</sup> , Symptom scale                                                                     | 33.53 (10.68) | 34.98 (10.53)          | 32.89 (10.70)              | <b>.04</b>  |
| <i>Antipsychotic treatment (at one year follow-up), n (%)</i>                                          |               |                        |                            |             |
| Antipsychotic use                                                                                      | 334 (61.1)    | 98 (59.8)              | 236 (61.6)                 | .68         |
| <i>Diagnoses, n (%)</i>                                                                                |               |                        |                            |             |
| Alcohol/substance use disorder                                                                         | 146 (26.7)    | 40 (24.4)              | 106 (27.7)                 | .43         |
| Schizophrenia (F20)                                                                                    | 362 (66.2)    | 104 (63.4)             | 258 (67.4)                 | .24         |
| Schizotypal disorder (F21)                                                                             | 79 (14.4)     | 30 (18.3)              | 49 (12.8)                  | .24         |
| Others (F22-F29)                                                                                       | 106 (19.4)    | 30 (18.3)              | 76 (19.8)                  | .24         |
| <i>Duration of untreated psychosis (DUP in weeks), median (range)<sup>8</sup></i>                      |               |                        |                            |             |
| DUP, weeks, (excl. F21)                                                                                | 48.0 (0-1248) | 52.8 (0-848)           | 43.0 (0-1248)              | .60         |

<sup>1</sup> Premorbid Adjustment Scale (Premorbid social functioning)<sup>44</sup>

<sup>2</sup> Premorbid Adjustment Scale (Premorbid academic functioning)<sup>44</sup>

<sup>3</sup> Scale for Assessment for Positive Symptoms (SAPS)<sup>21</sup>

<sup>4</sup> Scale for Assessment of Negative Symptoms (SANS)<sup>22</sup>

<sup>5</sup> Disorganized symptoms were assessed using SANS and SAPS

<sup>6</sup> Global Assessment of Functioning scale<sup>23</sup>

<sup>7</sup> GAF-S

<sup>8</sup> Duration of Untreated Psychosis (DUP)<sup>45</sup>

**eTable 2. Baseline characteristics among participants and non-participants at 20-year follow-up divided between the OPUS-group and TAU-group**

|                                                                          | All,<br>n=547    | OPUS<br>Participant<br>s,<br>n=84 | OPUS, Non-<br>participants,<br>n=191 | P<br>value  | TAU<br>Participants,<br>n=80 | TAU, Non-<br>participants,<br>n=192 | P<br>value  |
|--------------------------------------------------------------------------|------------------|-----------------------------------|--------------------------------------|-------------|------------------------------|-------------------------------------|-------------|
| <i>Sociodemographics, n (%)</i>                                          |                  |                                   |                                      |             |                              |                                     |             |
| Age, mean (SD)                                                           | 26.6 (6.4)       | 26.65 (5.8)                       | 26.69 (6.6)                          | .97         | 24.29 (5.2)                  | 27.51 (6.6)                         | <b>.000</b> |
| Sex, Female,                                                             | 224 (41.0)       | 47 (56.0)                         | 69 (36.1)                            | <b>.002</b> | 38 (47.5)                    | 70 (36.5)                           | .09         |
| Studying or working                                                      | 142 (26.4)       | 25 (30.1)                         | 50 (26.5)                            | .53         | 28 (35.4)                    | 39 (20.9)                           | <b>.01</b>  |
| Completed high school                                                    | 181 (33.6)       | 33 (39.3)                         | 65 (34.2)                            | .42         | 35 (43.8)                    | 48 (26.1)                           | <b>.004</b> |
| In a relationship                                                        | 133 (24.7)       | 20 (24.1)                         | 37 (19.6)                            | .40         | 23 (28.8)                    | 53 (28.3)                           | .95         |
| Being a parent                                                           | 79 (14.6)        | 14 (16.9)                         | 28 (14.7)                            | .65         | 5 (6.3)                      | 32 (17.1)                           | <b>.02</b>  |
| <i>Living conditions, n (%)</i>                                          |                  |                                   |                                      |             |                              |                                     |             |
| Living alone                                                             | 332 (61.7)       | 52 (63.4)                         | 113 (59.5)                           | .20         | 54 (67.5)                    | 113 (60.8)                          | .48         |
| Living with children                                                     | 16 (3.0)         | 5 (6.1)                           | 5 (2.6)                              |             | 0 (0.0)                      | 6 (3.2)                             |             |
| Living with a partner                                                    | 73 (13.6)        | 12 (14.6)                         | 21 (11.1)                            |             | 11 (13.8)                    | 29 (15.6)                           |             |
| Living with parents                                                      | 90 (16.7)        | 12 (14.6)                         | 37 (19.5)                            |             | 11 (13.8)                    | 30 (16.1)                           |             |
| Living in supported housing                                              | 3 (0.6)          | 0 (0.0)                           | 1 (0.5)                              |             | 0 (0.0)                      | 2 (1.1)                             |             |
| Homelessness                                                             | 24 (4.5)         | 1 (1.2)                           | 13 (6.8)                             |             | 5 (2.7)                      | 4 (5.0)                             |             |
| Independent living                                                       | 421 (78.3)       | 69 (84.1)                         | 139 (73.2)                           | <b>.05</b>  | 65 (81.3)                    | 148 (78.6)                          | .753        |
| <i>Symptom dimension, mean (SD)</i>                                      |                  |                                   |                                      |             |                              |                                     |             |
| Psychotic dimension <sup>3</sup><br>(excl. F21)                          | 2.96 (1.31)      | 3.14 (1.42)                       | 3.12 (1.25)                          | 0.90        | 2.88 (1.33)                  | 2.76 (1.29)                         | .50         |
| Negative dimension <sup>4</sup>                                          | 2.15 (1.15)      | 2.02 (1.15)                       | 2.22 (1.14)                          | .20         | 1.84 (1.08)                  | 2.29 (1.18)                         | <b>.004</b> |
| Disorganized dimension <sup>5</sup>                                      | 1.02 (0.95)      | 0.93 (0.91)                       | 1.09 (0.95)                          | .22         | 0.83 (0.90)                  | 1.06 (0.97)                         | .08         |
| <i>Global functioning score, mean (SD)</i>                               |                  |                                   |                                      |             |                              |                                     |             |
| GAF-F <sup>6</sup> , Function scale                                      | 41.32<br>(13.34) | 45.14<br>(13.05)                  | 40.08<br>(12.85)                     | <b>.003</b> | 43.86<br>(13.41)             | 39.77<br>(13.53)                    | <b>.02</b>  |
| GAF-S <sup>7</sup> , Symptom scale                                       | 33.53<br>(10.68) | 35.41<br>(10.75)                  | 31.45 (9.91)                         | <b>.003</b> | 34.54<br>(10.34)             | 34.36<br>(11.28)                    | .90         |
| <i>Antipsychotic treatment (at one year follow-up), n (%)</i>            |                  |                                   |                                      |             |                              |                                     |             |
| Antipsychotic use                                                        | 334 (61.1)       | 55 (65.5)                         | 127 (66.5)                           | .87         | 43 (53.8)                    | 109 (56.8)                          | .65         |
| <i>Diagnoses, n (%)</i>                                                  |                  |                                   |                                      |             |                              |                                     |             |
| Alcohol/substance use disorder                                           | 146 (26.7)       |                                   |                                      |             |                              |                                     |             |
| Schizophrenia (F20)                                                      | 362 (66.2)       | 52 (61.9)                         | 133 (69.6)                           |             | 52 (65.0)                    | 125 (65.1)                          |             |
| Schizotypal disorder (F21)                                               | 79 (14.4)        | 19 (22.6)                         | 22 (12.0)                            | <b>.03</b>  | 11 (13.8)                    | 26 (13.5)                           | .96         |
| Others (F22-F29)                                                         | 106 (19.4)       | 13 ( )                            | 35 ( )                               |             | 17 ( )                       | 41 ( )                              |             |
| <i>Duration of untreated psychosis (DUP), median (range)<sup>8</sup></i> |                  |                                   |                                      |             |                              |                                     |             |
| DUP, weeks, (excl. F21)                                                  | 48.0 (0-1248)    | 52.9 (0-832)                      | 39.0 (0-1248)                        | .56         | 52.29 (0-848)                | 51.9 (0-970)                        | .85         |

<sup>3</sup> Scale for Assessment for Positive Symptoms (SAPS)<sup>21</sup>

<sup>4</sup> Scale for Assessment of Negative Symptoms (SANS)<sup>22</sup>

<sup>5</sup> Disorganized symptoms were assessed using SANS and SAPS

<sup>6</sup> Global Assessment of Functioning scale<sup>23</sup>

<sup>7</sup> GAF-S

<sup>8</sup> Duration of Untreated Psychosis (DUP)<sup>45</sup>

| <b>eTable 3. Last observation characteristics (excluding the 20-year assessment) among participants and non-participants at 20-year follow-up divided between the OPUS-group and TAU-group</b> |                  |                                   |                                      |                  |                              |                                     |                  |
|------------------------------------------------------------------------------------------------------------------------------------------------------------------------------------------------|------------------|-----------------------------------|--------------------------------------|------------------|------------------------------|-------------------------------------|------------------|
|                                                                                                                                                                                                | All,<br>n=547    | OPUS<br>Participant<br>s,<br>n=84 | OPUS, Non-<br>participants,<br>n=191 | P<br>value       | TAU<br>Participants,<br>n=80 | TAU, Non-<br>participants,<br>n=192 | P<br>value       |
| <i>Symptom dimension, mean (SD)</i>                                                                                                                                                            |                  |                                   |                                      |                  |                              |                                     |                  |
| Psychotic dimension <sup>3</sup><br>(excl. F21)                                                                                                                                                | 1.38 (1.52)      | 1.02 (1.45)                       | 1.51 (1.49)                          | <b>0.03</b>      | 0.93 (1.38)                  | 1.58 (1.57)                         | <b>0.004</b>     |
| Negative dimension <sup>4</sup>                                                                                                                                                                | 1.73 (1.22)      | 1.33 (1.09)                       | 1.88 (1.16)                          | <b>&lt;0.001</b> | 1.26 (1.03)                  | 1.95 (1.33)                         | <b>&lt;0.001</b> |
| Disorganized dimension <sup>5</sup>                                                                                                                                                            | 0.57 (0.76)      | 0.40 (0.62)                       | 0.64 (0.82)                          | <b>0.02</b>      | 0.44 (0.66)                  | 0.63 (0.78)                         | 0.06             |
|                                                                                                                                                                                                |                  |                                   |                                      |                  |                              |                                     |                  |
| GAF-F <sup>6</sup> , Function scale                                                                                                                                                            | 52.16<br>(16.53) | 60.15<br>(16.67)                  | 49.21<br>(15.26)                     | <b>&lt;0.001</b> | 57.98<br>(15.11)             | 49.16<br>(16.58)                    | <b>&lt;0.001</b> |
| GAF-S <sup>7</sup> , Symptom scale                                                                                                                                                             | 51.21<br>(16.72) | 57.77<br>(16.75)                  | 48.53<br>(15.68)                     | <b>&lt;0.001</b> | 56.19<br>(16.13)             | 48.94<br>(16.84)                    | <b>0.001</b>     |

**eTable 4: Psychiatric Hospitalizations and Outpatient Contacts at one-two, two-five, five-ten and ten-20 Years after Randomization into Early Intervention Services (OPUS-treatment) vs. TAU**

|                                               | OPUS mean (SE) | TAU mean (SE) | Incidence Rate Ratio (95% CI) | P Value     |
|-----------------------------------------------|----------------|---------------|-------------------------------|-------------|
| Psychiatric hospitalizations (mean days/year) |                |               |                               |             |
| 0-2 y after randomization                     | 46.78 (4.397)  | 60.87 (5.047) | 0.768 (0.601; 0.983)          | <b>.04</b>  |
| 2-5 y after randomization                     | 19.85 (3.071)  | 23.90 (3.131) | 0.831 (0.559; 1.234)          | .36         |
| 5-10 y after randomization                    | 15.06 (2.758)  | 15.48 (2.686) | 0.973 (0.594; 1.594)          | .91         |
| 10-20 y after randomization                   | 11.95 (2.050)  | 9.93 (1.848)  | 1.204 (0.733; 1.977)          | .46         |
| Outpatient contacts (number of contacts/year) |                |               |                               |             |
| 0-2 y after randomization                     | 29.45 (1.298)  | 16.95 (1.223) | 1.738 (1.473; 2.051)          | <b>.000</b> |
| 2-5 y after randomization                     | 12.37 (0.881)  | 10.37 (0.816) | 1.193 (0.969; 1.469)          | .10         |
| 5-10 y after randomization                    | 8.06 (0.718)   | 8.11 (0.772)  | 0.994 (0.769; 1.284)          | .96         |
| 10-20 y after randomization                   | 5.98 (0.679)   | 4.99 (0.503)  | 1.197 (0.889; 1.612)          | .24         |

**eFigure 1: Global functional levels between the OPUS-group and the TAU-group since start of treatment**

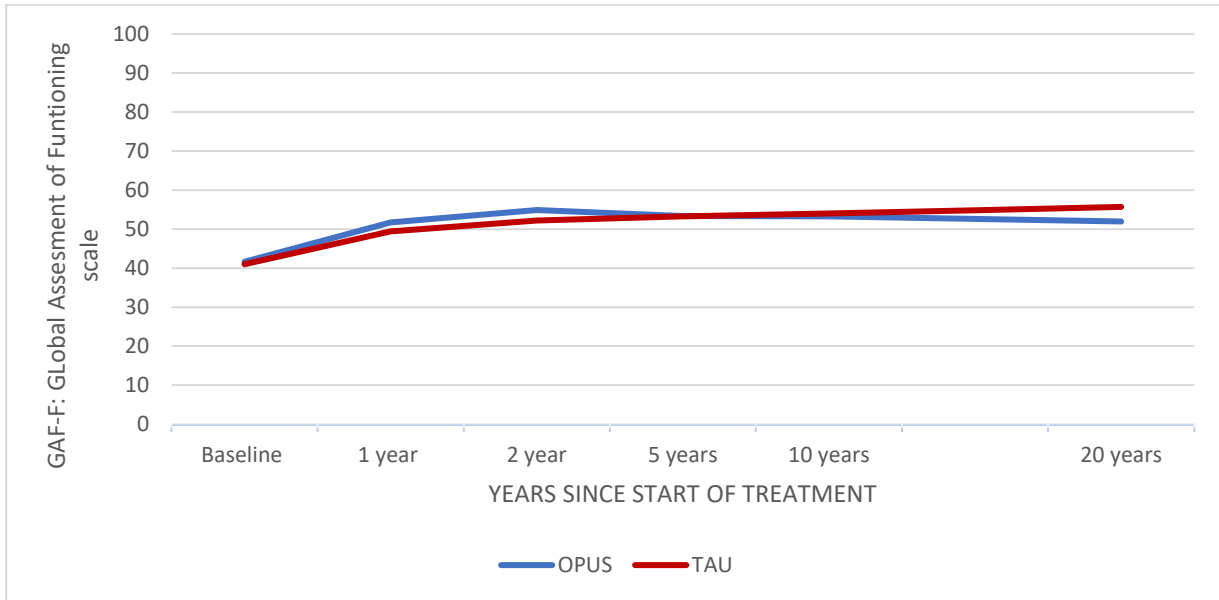

<sup>1</sup> Global assessment of functioning scale<sup>24</sup> (scale from 0-100)

**eFigure 2: Percentages of Participants in Clinical Recovery at Five-, Ten- and 20-years of Follow-up**

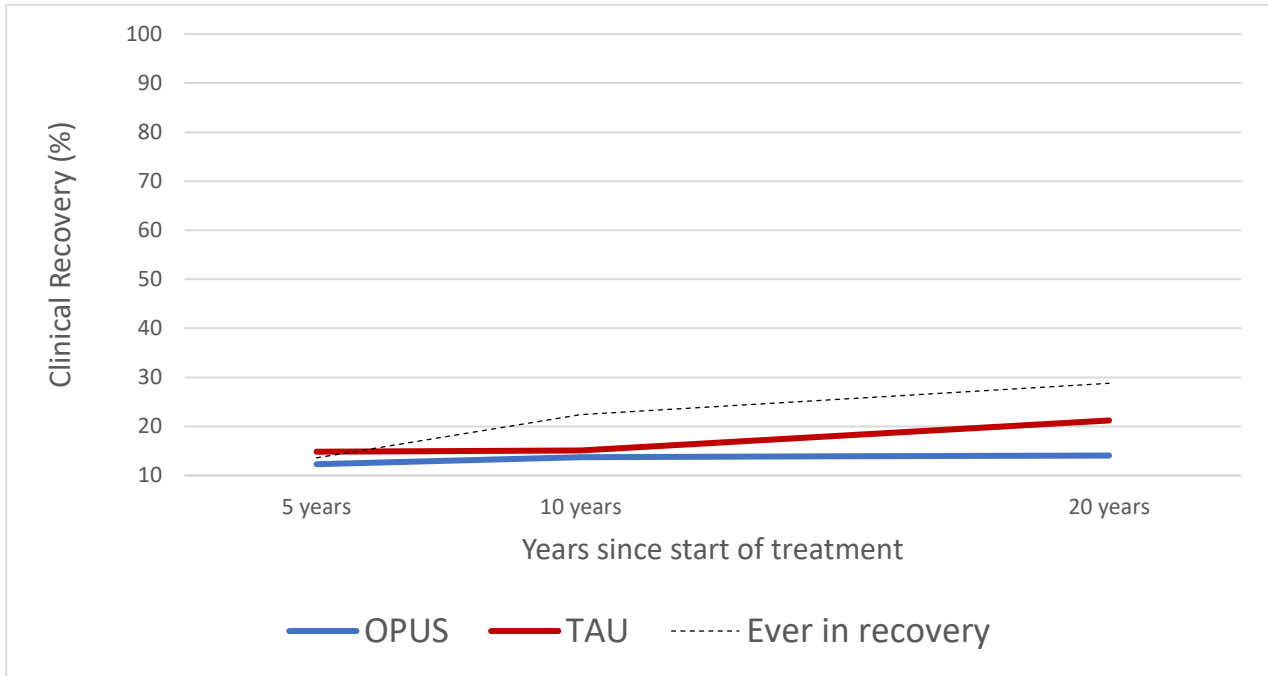

\*Percentages based on participants at each respective follow-up

Clinical recovery: defined as no psychotic episode, no psychiatric hospitalizations and no supported accommodation for two consecutive years before follow-up and currently studying or working and a GAF-F score of  $\geq 60$ .<sup>5</sup>

**eFigure 3: Psychiatric hospitalizations and outpatient contacts between the OPUS-group and the TAU-group since start of treatment**

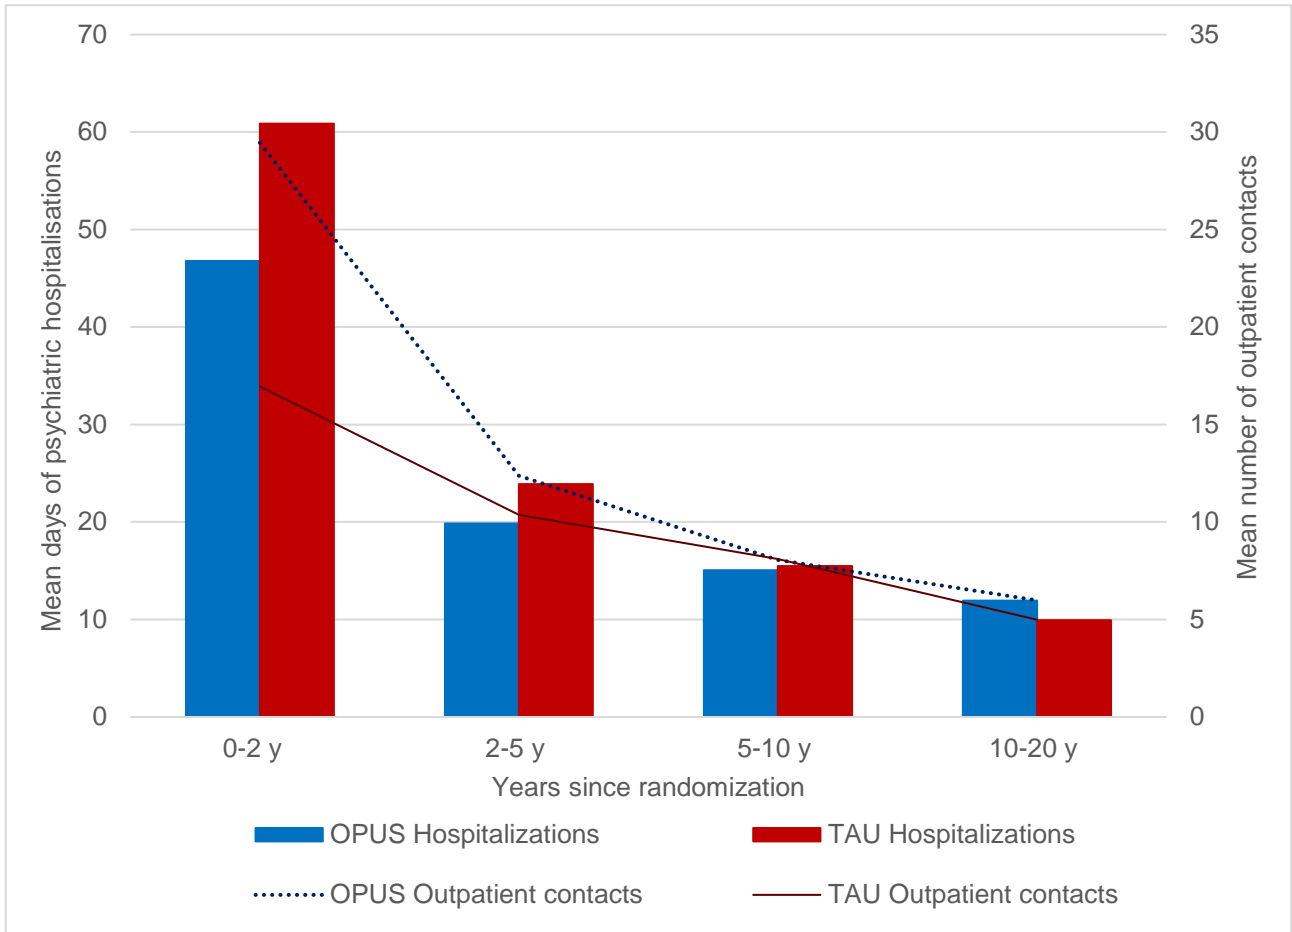

Supplement: jamapsychiatry-e225164-s001.pdf [file jamapsychiatry-e225164-s001.pdf]
