# Supplementary material
Source: PubMed Central journal article supplement (PMC9947803)
Supplement: jamapsychiatry-e225164-s002.pdf [file jamapsychiatry-e225164-s002.pdf]

## Data Sharing Statement

Hansen. Clinical Recovery and Long-Term Association of Specialized Early Intervention Services vs Treatment as Usual Among Individuals With First-Episode Schizophrenia Spectrum Disorder. *JAMA Psychiatry*. Published February 22, 2023.  
doi:10.1001/jamapsychiatry.2022.5164

### Data

**Data available:** No

### Additional Information

**Explanation for why data not available:** Strict regulations from the Danish data protection agency does not allow public access to individual patient data
